RESEARCH ARTICLE

# Promotion of mammalian angiogenesis by neolignans derived from soybean extracellular fluids

Farzaneh Kordbacheh<sup>1,2\*</sup>, Thomas J. Carruthers<sup>3</sup>, Anna Bezos<sup>2</sup>, Marie Oakes<sup>1</sup>, Lauren Du Fall<sup>1</sup>, Charles H. Hocart<sup>1</sup>, Christopher R. Parish<sup>2</sup>, Michael A. Djordjevic<sup>1</sup>

**1** Department of Plant Sciences, Research School of Biology, Australian National University, Canberra, Australian Capital Territory, Australia, **2** ACRF Department of Cancer Biology and Therapeutics, The John Curtin School of Medical Research, Australian National University, Canberra, Australian Capital Territory, Australia, **3** Research School of Chemistry, Australian National University, Canberra, Australian Capital Territory, Australia

\* [farzaneh.kordbacheh@anu.edu.au](mailto:farzaneh.kordbacheh@anu.edu.au)

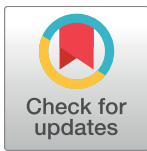

**OPEN ACCESS**

**Citation:** Kordbacheh F, Carruthers TJ, Bezos A, Oakes M, Du Fall L, Hocart CH, et al. (2018) Promotion of mammalian angiogenesis by neolignans derived from soybean extracellular fluids. PLoS ONE 13(5): e0196843. <https://doi.org/10.1371/journal.pone.0196843>

**Editor:** Ramani Ramchandran, Medical College of Wisconsin, UNITED STATES

**Received:** August 7, 2017

**Accepted:** April 20, 2018

**Published:** May 8, 2018

**Copyright:** © 2018 Kordbacheh et al. This is an open access article distributed under the terms of the [Creative Commons Attribution License](https://creativecommons.org/licenses/by/4.0/), which permits unrestricted use, distribution, and reproduction in any medium, provided the original author and source are credited.

**Data Availability Statement:** All relevant data are within the paper and its Supporting Information files.

**Funding:** MAD and CRP received research funding for this project, i.e., ARC Discovery Grant DP1096299 Dr MA Djordjevic; Prof LN Mander; Prof CR Parish “New functions for bioactive flavonoids in plants and mammals”; ARC Centre of Excellence Grant (CE0348212) and NHMRC Program Grant 455395 M. Berndt, C. Chesterman, B. Chong, P. Hogg, L. Khachigian, C. Parish and R.

## Abstract

Excessive or insufficient angiogenesis is associated with major classes of chronic disease. Although less studied, small molecules which can promote angiogenesis are being sought as potential therapeutics for cardiovascular and peripheral arterial disease and stroke. Here we describe a bioassay-directed discovery approach utilising size exclusion and liquid chromatography to purify components of soybean xylem sap that have pro-angiogenic activity. Using high resolution accurate mass spectrometry and nuclear magnetic resonance spectroscopy, the structure of two pro-angiogenic molecules (**FK1** and **FK2**) were identified as *erythro*-guaiacylglycerol-8-O-4'-(coniferyl alcohol) ether (**eGGCE**), and *threo*-guaiacylglycerol-8-O-4'-(coniferyl alcohol) ether (**tGGCE**). These two molecules, which are coniferyl neolignan stereoisomers, promoted *in vitro* angiogenesis in the  $\mu\text{M}$  to nM range. Independently sourced samples of **eGGCE** and **tGGCE** exhibited comparable pro-angiogenic activity to the soybean derived molecules. The cellular mode of action of these molecules was investigated by studying their effect on endothelial cell proliferation, migration, tube formation and adhesion to the extracellular matrix (ECM) components, fibronectin and vitronectin. They were found to enhance endothelial cell proliferation and endothelial cell tube formation on Matrigel, but did not affect endothelial cell migration or adhesion to fibronectin and vitronectin. Thus, this study has identified two coniferyl neolignan stereoisomers, **eGGCE** and **tGGCE**, as pro-angiogenic molecules, with **eGGCE** being less active than **tGGCE**.

## Introduction

The formation of new capillaries from pre-existing vascular networks (angiogenesis) is a tightly controlled process in adult mammals. Excessive or insufficient angiogenesis is associated with major classes of chronic disease. Excessive angiogenesis is associated with cancer, psoriasis, age-related macular degeneration and arthritis [1–3] and this has fostered the

Stocker. Program entitled: "Vascular Biology". The funders had no role in study design, data collection and analysis, decision to publish, or preparation of the manuscript.

**Competing interests:** CRP holds stocks in the start-up companies Lipotek and Beta Therapeutics and in the publicly traded companies Biotron and TBG Diagnostics. The other authors declare no competing financial or other interests. This does not alter our adherence to PLOS ONE policies on sharing data and materials.

isolation, identification and testing of an extensive range of anti-angiogenic molecules in clinical trials [4–6]. Although receiving less attention, the possibility of using pro-angiogenic molecules as therapeutic agents has recently emerged. Pro-angiogenic drugs have the potential to aid in treating diseases and conditions where the formation of new blood vessels is needed as, for example, in wound healing [1, 7, 8], cardiovascular disease [9, 10] and stroke [11–13]. Only a limited number of pro-angiogenic molecules have been studied in clinical settings, including erythropoietin (EPO) [14],  $\beta$ -carotene [15], nicotine [16–18], ferulic acid [19], stromal cell-derived factor 1 (SDF-1) [20] and VEGF [21]. However, unlike anti-angiogenic drug candidates, none of these molecules have translated well into the clinic [21, 22] and, therefore, it is of great interest to identify and explore more compounds with pro-angiogenic activity.

Historically, plant-derived natural products have been a rich source of therapeutic compounds, for example, salicylic acid [23], taxol [24], vincristine, vinblastine [5] and camptothecin [25] to name but a few. Recently Wang et al., scrutinised the available literature on plant-derived anti-angiogenic products and came up with a few phytochemical compounds which could affect tumour angiogenesis and pathological tumour vasculature [26]. However, pharmacologically active compounds in plants often exist at very low concentrations and this presents challenges to developing effective extraction and purification protocols [27].

A stratagem that enhances the potential for success in identifying potential therapeutic activities in fractionated plant material is to couple purification with a sensitive and robust activity-guided biological assay [28, 29]. The rat aorta ring assay has been used successfully to screen for compounds that modulate angiogenesis, *in vitro* [30–32]. The anti-angiogenic drug, PI-88 (Muparfostat; a sulfated oligosaccharide) [33], which has reached a phase III clinical trial in hepatocellular carcinoma patients [34], was identified using a modified version of this assay which involved human placental blood vessel fragments (Brown et al 1996).

The rat aortic ring assay is thought to provide a bridge between *in vivo* and *in vitro* angiogenesis models [32]. This assay not only includes endothelial cells but also their surrounding cells [30] and rat aortic rings cultured in collagen gel give rise to microvascular networks composed of branching endothelial channels which approximate a microvascular network. Therefore, it is thought that using the rat aorta assay reproduces more accurately the environment in which angiogenesis takes place *in vivo* than alternative procedures using preselected endothelial cells and their subsequent passaging *in vitro*. However, since angiogenesis predominantly occurs at the microvascular level, the use of large vessels, such as aorta, as the source of new vessels may be a less-than-ideal choice [30, 35]. Although the rat aorta assay is useful for screening angiogenesis modulating compounds, an understanding of the cellular mode of action requires additional bioassays to examine the individual mechanistic steps of angiogenesis, such as endothelial cell proliferation, migration, adhesion and tube formation [30].

In this paper we used a modification of the rat aorta assay [36] that enabled us to screen for, and discriminate between, pro- and anti-angiogenic activities in fractionated extracts of soybean xylem sap. Using this approach we identified three fractions of soybean xylem sap that enhanced angiogenesis and, subsequently, characterised the proangiogenic molecules in two of these fractions and determined their mode of action.

## Materials and methods

### Materials

Analytical grade reagents were obtained from Sigma-Aldrich, St. Louis, MO and Ajax Chemicals, Auburn, NSW, Australia. Soybean seeds (*Glycine max* cultivar Bragg) were obtained from Prof. Peter Gresshoff, University of Queensland, Australia. Deionised water was used in all laboratory procedures ( $>18.2$  M $\Omega$ .cm; Millipore, Billerica, MA). Commercial eGGCE was

purchased from BOC Sciences, New York, NY and *tGGCE* (isolated from *Bretschneidera sinensis*) was kindly provided by Prof. Dr. Wei-Dong Zhang and Dr. Shan Lei from the Second Military Medical University, Shanghai, China.

### Soybean growth and xylem sap isolation

Soybeans were grown in square pots (100 × 100 × 300 mm) containing vermiculite (Ausperl, Banksmeadow, NSW, Australia) under glasshouse conditions of 14 hr light (28°C) and 10 hr dark (25°C). Pots were watered every day with ~200 mL of urban water which was replaced with modified Herridge's nutrients [37] containing 10 mM KNO<sub>3</sub> every second day from the second week of planting.

Xylem sap, a clear solution lacking any visible signs of chlorophyll contamination, was collected from decapitated plants, 4–6 weeks post-germination [38, 39]. Sap was collected between 0–7 hr from the wound site by attaching 5 mL syringes via a short length (3–4 cm) of rubber tubing (i.d., 3 mm) fitted over the cut stump. Exudation was estimated at 0.34 mL/hr per plant over 24 hr. Sap from 50–300 plants was pooled and lyophilized overnight.

### Size fractionation and HPLC separation

Molecular weight spin filters (10 kDa and 3 kDa; Merck Millipore, Billerica, MA) were utilised in succession to remove the high molecular weight sap proteins [38] and enrich the low molecular weight sap molecules. The 3 kDa filtrate was freeze dried, redissolved in 100 µL of water (equivalent to 40 mL of fresh xylem sap) and analysed by HPLC (LC10-VP series, Shimadzu, Kyoto, Japan) using a reverse phase Alltech Platinum C18 column (5 µm, 250 × 4.6 mm) and guard cartridge (Grace Discovery Sciences, Columbia, MD). The column was held at 35°C and eluted over 30 min with a linear gradient of 5% to 85% acetonitrile (hold 5 min) at 1 mL/min. Sample components were detected with a photodiode array (PDA) detector and peaks collected by monitoring UV absorbance in real time at 254 nm. Fractions were collected from 2 to 30 min at 30 sec intervals, dried under nitrogen, diluted to 200 µL with water and either screened for activity in the pro-angiogenic bioassay or stored at -70°C.

The semi-preparative purification of *FK1* and *FK2* utilised the Alltima C18 column as above (50 µL injection, 20 mL sap equivalent) with an optimised linear gradient of 20% (hold 5 min) to 31% (over 15 min) acetonitrile with a final wash over 5 min from 31% to 85% (hold 5 min).

### Bioassay for angiogenesis modulating activity using the *in vitro* rat aorta assay

The rat aorta angiogenesis bioassay [33] was modified to enhance the ability to screen for pro-angiogenic activity in the HPLC-derived fractions by reducing the concentration of heat inactivated foetal calf serum (HIFCS) from 20% to 5% and incubating for 7 days in 48 well culture plates (Costar, Corning, Lowell, MA) at 37°C in 5% CO<sub>2</sub> [36]. Six technical and three biological replicates were used and the medium was changed on day 4 of culture. Vessel outgrowth was quantified as percent growth under a Nikon TMS inverted phase contrast microscope (Nikon Instrument Inc., Tokyo, Japan) at 40 × magnification on days 5, 6 and 7. Control cultures either received medium with the diluent alone or with the known anti-angiogenic agent, PI-88 [33] added at 100 µg/mL. Vessel outgrowth was determined as the percentage of a microscope field, outside the aorta ring, that was occupied by blood vessels using ImageJ software as previously described [40] or measured manually, particularly when large numbers of column fractions needed to be scored.

## Liquid chromatography mass spectrometry (LC-MS)

Mass spectrometry of the purified pro-angiogenic components was carried out using an Agilent 6530 Accurate Mass LC-MS Q-TOF (Santa Clara, CA). Samples were subjected to electrospray ionisation (ESI) in the Jetstream interface in positive and negative modes under the following conditions: gas temperature 300°C, drying gas 4 L/min, nebulizer 35 psig, sheath gas temperature 350°C and flow rate of 11 L/min, capillary voltage 3500 V, fragmentor 175 V, and nozzle voltage 1000 V. Unfractionated xylem sap or HPLC purified pro-angiogenic components (3 µL) were injected onto an Agilent Eclipse XDB-C18 (2.1 × 50 mm column; 1.8 µm) and eluted with a linear gradient from 10 to 50% of mobile phase B in 8 min, then to 70% in 4 min (hold for 8 min) at a flow rate of 200 µL/min. Mobile phase A was water containing 0.1% formic acid; mobile phase B was acetonitrile/water (9:1 v/v) containing 0.1% formic acid. The instrument was run in extended dynamic range mode from  $m/z$  100–3000 and data acquired by targeted collision induced dissociation (CID; N<sub>2</sub> collision gas supplied at 18 psi) MS/MS (2 spectra/s). Data were acquired and analysed with Agilent's MassHunter software.

## Nuclear magnetic resonance spectroscopy (NMR)

Nuclear magnetic resonance (NMR) spectroscopy experiments were recorded on either a Bruker AVANCE 800 or 600 MHz NMR spectrometer with TCI cryoprobe (Bruker, Billerica, MA) using D<sub>2</sub>O as the solvent at 298 K. Spectra were analysed using Bruker TopSpin 2.1 software. <sup>1</sup>H NMR chemical shifts in parts per million (ppm) are reported using the HOD signal as an internal chemical shift reference (4.72 ppm at 298 K). <sup>13</sup>C chemical shifts in ppm are referenced indirectly to the proton shift.

**<sup>1</sup>H:** 1D proton NMR spectra were performed using a standard Bruker pulse program, *zgpr*, which included solvent suppression via pre-saturation. A total experiment time of 5 min was used with a  $t_{1\max}$  of 1.25 sec. **<sup>1</sup>H-<sup>1</sup>H DQF-COSY:** A phase-sensitive DQF-COSY spectrum was also measured using the standard Bruker sequence *cosydfpphr*, which includes a double-quantum filter and pre-saturation. A total experiment time of 38 min was used with a  $t_{1\max}$  of 26 msec and a  $t_{2\max}$  of 104 msec. **<sup>1</sup>H-<sup>1</sup>H TOCSY:** A TOCSY spectrum was measured using the Bruker pulse program *mlevphpp* that was modified to include pre-saturation. A total experiment time of 19 min was used with a  $t_{1\max}$  of 13 msec, a  $t_{2\max}$  of 250 msec and a TOCSY mixing time of 60 msec. **<sup>1</sup>H-<sup>1</sup>H NOESY:** A NOESY spectrum was recorded using the Bruker pulse program *noesygpplpp* modified to include pre-saturation. A total experiment time of 14.2 hr was used with a  $t_{1\max}$  of 39 msec, a  $t_{2\max}$  of 1.62 sec and a 500 msec NOE mixing time. **<sup>13</sup>C-<sup>1</sup>H HSQC:** A <sup>13</sup>C-HSQC spectrum was recorded using the standard Bruker pulse sequence *hsqcedetgpsisp2.2*. A  $t_{1\max}$  of 15.3 msec, a  $t_{2\max}$  of 152 msec and a total experiment time of 2.3 hr was used. **<sup>13</sup>C-<sup>1</sup>H HMBC:** A <sup>13</sup>C-HMBC spectrum was recorded using the standard Bruker pulse sequence *hmbcetgpl2nd*, which includes a two-fold low-pass *J*-filter to suppress one-bond correlations. A  $t_{1\max}$  of 10.1 msec, a  $t_{2\max}$  of 304 msec and a total experiment time of 8 hr was used.

## Cell proliferation (mitogenic) assay

Human umbilical vein endothelial cell (HUVEC) proliferation was assessed by determining <sup>3</sup>H-thymidine incorporation [41]. HUVECs were cultured in M199 medium supplemented with 20% HIFCS, 0.24 mg/mL gentamycin, 2 mM L-glutamine, 0.04 mg/mL endothelial cell growth supplement (ECGS) (Sigma-Aldrich, St. Louis, MO) and 0.135 mg/mL heparin (Sigma-Aldrich, St. Louis, MO) in gelatin-coated 96-well plates and incubated for 4 days at 37°C in 5% CO<sub>2</sub> to reach confluence. The confluent cells were then serum starved for 24 hr. Subsequently, 100 µL/well of test compound in serum-free medium with or without basic fibroblast growth factor (bFGF) (R&D Systems, Minneapolis, MN) was added to each well for another 24 hr before adding

$^3\text{H}$ -thymidine.  $^3\text{H}$ -thymidine (0.5  $\mu\text{Ci}/\text{well}$ ; MP Biomedicals, Solon, OH) was added and incubated for the final 24 hr. Incubation was stopped by adding 100  $\mu\text{L}/\text{well}$  of trypsin/EDTA to lift the cells from the gelatin layer with 100  $\mu\text{L}/\text{well}$  of M199 medium supplemented with 20% HIFCS added to neutralize the trypsin enzymatic activity. Finally, plates were frozen and thawed 3 times and cells were harvested using a 96-well cell Filtermate 196 harvester, with EasyTab<sup>TM</sup>-C self-aligning filters and the incorporated radioactivity counted with a Topcount<sup>®</sup>NXT<sup>™</sup> Microplate Scintillation and Luminescence Counter (Packard Bioscience, Meriden, CT).

### Cell migration assay (wound healing assay)

Label-free, kinetic assays for cell migration used the IncuCyte<sup>™</sup> live-cell imaging system (Essen BioSciences, Ann Arbor, MI) following the techniques described previously [42]. Briefly, human microvascular endothelial cells (HMEC) were added to 96-well ImageLock Essen plates (Essen BioSciences, Ann Arbor, MI) at  $2.5 \times 10^4$  cells/well in 100  $\mu\text{L}/\text{well}$  of MCDB 131 medium (Invitrogen) supplemented with 10% HIFCS, 0.1% PSN (0.03 g/L penicillin G, 0.05 g/L streptomycin sulfate, 0.05 g/L neomycin sulfate), 2 mM L-glutamine, 0.01  $\mu\text{g}/\text{mL}$  endothelial cell growth factor (ECGF), (Gibco BRL, Grand Island, NY) and 1  $\mu\text{g}/\text{mL}$  hydrocortisone (Sigma-Aldrich, St. Louis, MO) and incubated for 2 days at 37°C in 5% CO<sub>2</sub> to reach confluence. After removing the medium from each well, a wound was made in the HMEC monolayer using the 96-pin WoundMaker device. The use of Essen ImageLock plates ensured that the wounds were automatically located and registered by the IncuCyte software for imaging and data recording.

Each well was then rinsed twice with 100  $\mu\text{L}/\text{well}$  of culture medium to prevent dislodged cells from setting and re-attaching. Medium (100  $\mu\text{L}/\text{well}$ ), with or without test compound, was added to each well. Wound images were then captured and saved at 2 hr intervals until control wounds had recovered completely. The data was analysed either by the IncuCyte software package or extracted by three integrated metrics (wound width, wound confluence, relative wound density) and analysed by Prism statistical software.

### Endothelial cell tube formation assay

HMEC and HUVEC cultures were used for *in vitro* endothelial tube formation. Matrigel (BD Biosciences, Bedford, MA) was thawed overnight at 4°C and plated into ice-cold 96-well ImageLock Essen plates at 50  $\mu\text{L}/\text{well}$  using pre-cooled pipets, tips and tubes. The plates were incubated at 37°C in 5% CO<sub>2</sub> for 1 hr to allow the Matrigel to form a stable gel. HUVECs at  $4 \times 10^4$  cells/well in 100  $\mu\text{L}$  of M199 medium supplemented with 20% HIFCS, 0.24 mg/mL gentamycin, 2 mM L-glutamine, 0.04 mg/mL ECGS, and 0.135 mg/mL heparin with or without test compounds were added and Matrigel cultures placed inside the IncuCyte and incubated at 37°C for 24 hr.

HMEC (100  $\mu\text{L}$ ;  $5 \times 10^4$  cells/well) in MCDB 131 medium supplemented with 10% HIFCS, 0.1% PSN, 2 mM L-glutamine, 0.01  $\mu\text{g}/\text{mL}$  ECGF, and 1  $\mu\text{g}/\text{mL}$  hydrocortisone  $\pm$  test compounds were added to the Matrigel. Tube formation was imaged at 2 hr intervals using the IncuCyte<sup>™</sup> live-cell imaging system with the phase-contrast ImageLock scan type. The images were analysed by measuring percentage of denuded area and number of sprouting cells at early stages of tube formation (4 hr) and the total number and length of tubes formed at later stages of tube formation (6 hr) in each well using IncuCyte and NIH ImageJ software with the Angiogenesis Analyzer plugin [43] for quantification of tube networks.

### Rose Bengal cell adhesion assay

The Rose Bengal cell adhesion assay is based on a previously described method [44] used to measure the interaction of antibodies with cell surface antigens using an automated



colorimetric assay. A 96 round bottom (U-well) culture plate (Costar, Corning, Lowell, MA) was first coated either with bovine plasma fibronectin (Invitrogen, Carlsbad, CA) or purified human vitronectin (Gibco BRL, Grand Island, NY) at 50  $\mu\text{L}/\text{well}$  at selected concentrations ranging from 0.313 to 10  $\mu\text{g}/\text{mL}$  and incubated overnight at 4°C. The liquid layer was then removed and the cells washed by submerging twice in a PBS bath (removing the PBS between washes). The non-specific binding sites were then blocked by incubation with 200  $\mu\text{L}/\text{well}$  of 1% BSA in Hank's balanced salt solution (HBSS) for 1 hr at 37°C before removing the supernatant. HMEC ( $5 \times 10^4$  cells/well) were added in 100  $\mu\text{L}/\text{well}$  of serum free culture medium supplemented with 0.1% BSA with or without the test compounds. The plate was then incubated for (2.5–60 min) at 37°C. Unbound cells were removed and 100  $\mu\text{L}/\text{well}$  of 0.25% (w/v) Rose Bengal dye (Koch-Light Laboratories Ltd., Colnbrook, Berkshire, England) in PBS was added to stain the bound cells, for 3 min at room temperature. The non-absorbed dye was then removed and the plate washed twice by submerging in fresh PBS baths.

After draining the plate, 200  $\mu\text{L}/\text{well}$  of 50% ethanol in PBS was added and mixed to liberate dye from the cells. Non-specific binding of the dye to fibronectin/vitronectin-coated and uncoated wells in the presence and absence of cells was also determined and subtracted. The relative number of bound-cells in each well was quantified by determining each well's optical density (OD) at  $\lambda_1 = 540$  nm and  $\lambda_2 = 650$  nm, on a Thermomax microplate reader (Molecular Devices, Sunnyvale, CA). The data was then analysed by GraphPad prism 5.04 software (GraphPad Software, San Diego, CA).

### Statistical analyses

Data are reported as mean  $\pm$  SEM. Statistical significance was measured using a two-tailed unpaired *t*-test between the sample treated and untreated groups and one-way and two-way ANOVA, comparing each group to control and other groups using the GraphPad prism 5.04 software. *P* values less than 0.05 were considered statistically significant.

## Results

### Isolation and fractionation of low molecular weight pro-angiogenic molecules from soybean xylem sap

Concentrated soybean xylem sap was fractionated using reversed-phase C18 HPLC chromatography and screened for the presence of hydrophobic, low molecular weight angiogenesis-modulating molecules using the rat aorta ring bioassay. Although yield varied depending upon plant growth, fractions eluting at 7–7.5, 13.5–14 and 18–18.5 min gave highly consistent and significant pro-angiogenic activity when measured at days 5, 6 and 7 using the rat aorta assay (Fig 1A). We focussed on the more hydrophobic fractions at 13.5–14 and 18–18.5 min because activity strongly correlated with the presence of UV absorbing peaks at these elution times (S1 Fig). The UV absorbing and biologically active fractions were separated using an optimised HPLC gradient (Fig 1B). Two peaks eluting between 13.5–14 min gave identical UV absorption spectra each of which were distinguishable from the peak at 18–18.5 min (S1 Fig). The three purified fractions (designated *FK1*, *FK2* and *P6*) showed significant pro-angiogenic activity (Fig 1C–1E). Upon long term storage the activity of *P6* diminished, suggesting instability, but *FK1* and *FK2* were stable. Due to instability and insufficient material, *P6* was not analysed further.

### NMR analysis of purified *FK1* and *FK2*

A scaled-up extraction of 300 plants yielded 2000 mL of xylem sap. Optimization of the HPLC separation of *FK1* and *FK2* enabled the isolation of 458  $\mu\text{g}$  of *FK1* and 387  $\mu\text{g}$  of *FK2* of

sufficient purity to enable NMR and MS analysis. The pro-angiogenic activity of the purified *FK1* and *FK2* was confirmed by bioassay before nuclear magnetic resonance (NMR) and mass spectrometry (MS) analysis (see below) which validated that the isolated *FK1* and *FK2* were pure, UV absorbing and biologically active.

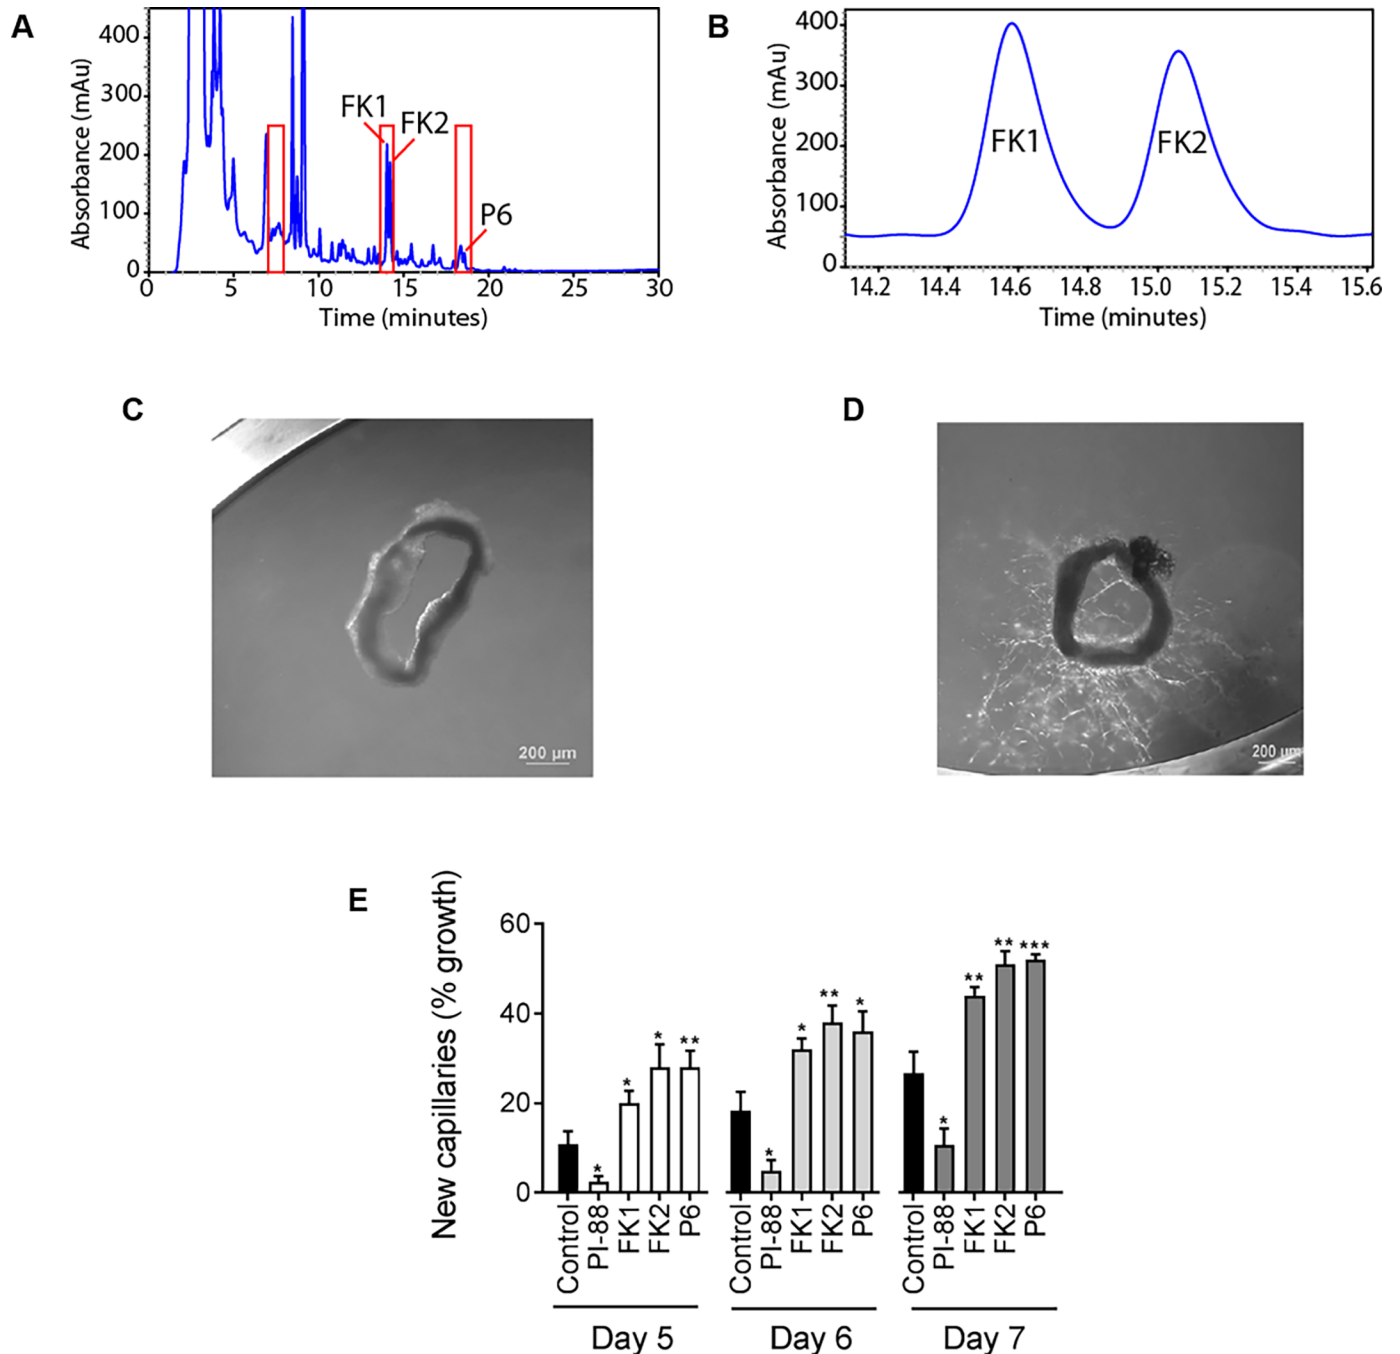

**Fig 1. Biological activity of HPLC fractionated soybean xylem sap.** A, UV absorbance at 254 nm of HPLC separated xylem sap material, the injection volume of 50  $\mu$ L containing a sap concentrate equivalent to 20 mL of sap. Fractions were collected at 30 s intervals and tested by the rat aorta ring assay and fractions with pro-angiogenic activity are highlighted in red. B, Separation of *FK1* and *FK2* using a shallow gradient for a large scale purification (see [methods](#)). C, D The pro-angiogenic activity of the test compounds is expressed as a percentage of aorta vessel outgrowths observed on days 5, 6 and 7 based on the field of view, with (C) depicting 0% outgrowth and (D) 60% outgrowth. E, Biological activity of fractions containing purified *FK1*, *FK2* or *P6* using the rat aorta ring assay. Day 5–7 results are shown. Control cultures received medium with the diluent only or diluent with the anti-angiogenic compound, PI-88, at 100  $\mu$ g/ml.

<https://doi.org/10.1371/journal.pone.0196843.g001>

Initial 1D  $^1\text{H}$  NMR spectra were recorded for both **FK1** and **FK2** products. **FK1** was determined to be more pure and of higher concentration, so initial structure determination was performed on this product.  $^{13}\text{C}$ -HSQC,  $^{13}\text{C}$ -HMBC,  $^1\text{H}$ - $^1\text{H}$  DQF-COSY,  $^1\text{H}$ - $^1\text{H}$  TOCSY and  $^1\text{H}$ - $^1\text{H}$  NOESY NMR spectra were then measured of **FK1** and structural fragments were constructed as follows. Two methoxy resonances were identified in the  $^1\text{H}$  NMR spectrum at  $\delta$  3.68 (3H, s, **H-10**) and  $\delta$  3.70 (3H, s, **H-10'**). Two protons at  $\delta$  6.56 (1H, dt,  $J = 16.0, 1.0$  Hz, **H-8'**) and  $\delta$  6.30 (1H, dt,  $J = 15.9, 6.0$  Hz, **H-7'**) were identified in a *trans* double bond arrangement due to their  $^3J$  coupling of 16.0 Hz, and were linked to a degenerate methylene group at  $\delta$  4.25 (2H, dd,  $J = 6.0, 0.9$  Hz, **H<sub>2</sub>-9'**) via their  $^3J$  and  $^4J$  couplings, respectively. Proton signals at  $\delta$  4.07 (dd,  $^2J = 12.3$  Hz,  $^3J = 2.8$  Hz, 1H, **H-9a**) and  $\delta$  3.94 (dd,  $^2J = 12.3$  Hz,  $^3J = 6.7$  Hz, 1H, **H-9b**) were linked through their  $^2J$  coupling and their shared carbon shift in the  $^{13}\text{C}$ -HSQC spectrum, and were linked to a multiplet at  $\delta$  4.66 (m, 1H, **H-8**) via the DQF-COSY. An ABX aromatic coupling system was identified, and positioned the aromatic proton at  $\delta$  6.86 (dd,  $^3J = 8.1$  Hz,  $^4J = 1.9$  Hz, 1H, **H-6**) *meta* from  $\delta$  6.88 (d,  $^4J = 2.0$  Hz, 1H, **H-2**) and *ortho* to  $\delta$  6.74 (d,  $^3J = 8.1$  Hz, 1H, **H-5**). Three further aromatic protons were identified and linked via the TOCSY cross-peaks, but needed correlations from the HSQC and HMBC spectra to resolve  $\delta$  6.97, (overlapped s, 1H, **H-6'**) as *ortho* to  $\delta$  6.97, (overlapped s, 1H, **H-5'**), and *para* to  $\delta$  6.98 (bs, 1H, **H-2'**). The HSQC and HMBC spectra were also used to resolve a solvent overlapped peak,  $\delta$  4.7 C $\delta$  72.54 (overlapped m, 2H, **H-7**, **C-7**) and link this resonance to C $\delta$  61.52 (**C-9**). The methoxy group **H<sub>3</sub>-10** was linked to **H-2** via the NOESY spectrum and to C $\delta$  147.72 (**C-3**) via the HMBC spectrum, which was also linked to **H-6** and **H-5**. Methoxy **H<sub>3</sub>-10** was linked to **H-2'** via the NOESY spectrum and to C $\delta$  149.22 (**C-3'**) via the HMBC spectrum, which was further linked to **H-5'** and **H-6'**. NOEs were observed between **H-2'**, **H-5'** and **H6'** to **H-7'** and **H-8'**, linking these fragments, and was positioned by the HMBC correlation from **H-7'** to C $\delta$  119.45 (**C-6'**) and C $\delta$  109.78 (**C-2'**) as was **H-8'** to C $\delta$  131.13 (**C-1'**). Finally, HMBC correlations between **6-H**, **2-H** and **C-7** and further correlations between **H-8** and C $\delta$  146.94 (**C-4'**) constructed the final compound.

Assignments could easily be made for **FK2** due to the similarity of the  $^{13}\text{C}$ -HSQC cross-peaks to those of **FK1** and  $^1\text{H}$ - $^1\text{H}$  couplings constants (S2 Fig). It was then proposed that **FK1** and **FK2** were diastereomers, with undefined chirality of **C-7** and **C-8**. The compound identified (Fig 2) was proposed to be the previously described natural product guaiacylglycerol-8-O-4' (coniferyl alcohol) ether (GGCE), coniferyl neolignans of which there are four possible stereoisomers. The NMR spectra were found to be in agreement with previously reported chemical shifts and couplings [45].

### LC-MS/MS analysis of purified **FK1** and **FK2**

Initial QTOF MS data implied a chemical formula of  $\text{C}_{20}\text{H}_{22}\text{O}_6$ , for both **FK1** and **FK2**. However, through the NMR structure elucidation process, an extra proton shift was identified correlated to the spin system of **FK1**. It was proposed that the mass initially observed in the QTOF MS was in fact the  $[\text{M}-\text{H}_2\text{O}]^-$  peak, implying a formula of  $\text{C}_{20}\text{H}_{24}\text{O}_7$ . This was confirmed by reducing the nebulizer spray temperature to reveal the predicted molecular ions for **FK1** and **FK2** by both -ve ESI ( $[\text{M}-\text{H}]^-$ ,  $m/z$  375) (Fig 3 and S1 Table) and +ve ESI ( $\text{M}^+$ ,  $m/z$  376; and  $[\text{M}+\text{Na}]^+$ ,  $m/z$  399) (S3 Fig and S2 Table).

The deprotonated **FK1** and **FK2** molecules ( $m/z$  375,  $[\text{M}-\text{H}]^-$ ) were essentially identical to those reported by Morreel *et al.* [46], comprising a series of losses of  $\text{H}_2\text{O}$  ( $m/z$  357,  $[\text{M}-\text{H}-\text{H}_2\text{O}]^-$ ), formaldehyde ( $m/z$  327,  $[\text{M}-\text{H}-\text{H}_2\text{O}-\text{CH}_2\text{O}]^-$ ) and a methyl moiety ( $m/z$  312,  $[\text{M}-\text{H}-\text{H}_2\text{O}-\text{CH}_2\text{O}-\text{CH}_3]^-$ ) (Fig 3) [46, 47]. A comparison of the observed and calculated masses for the two deprotonated isomers and their associated fragments showed them to be in good agreement ( $\Delta$ ppm between -3.19 and 4.85) (S2 Table).



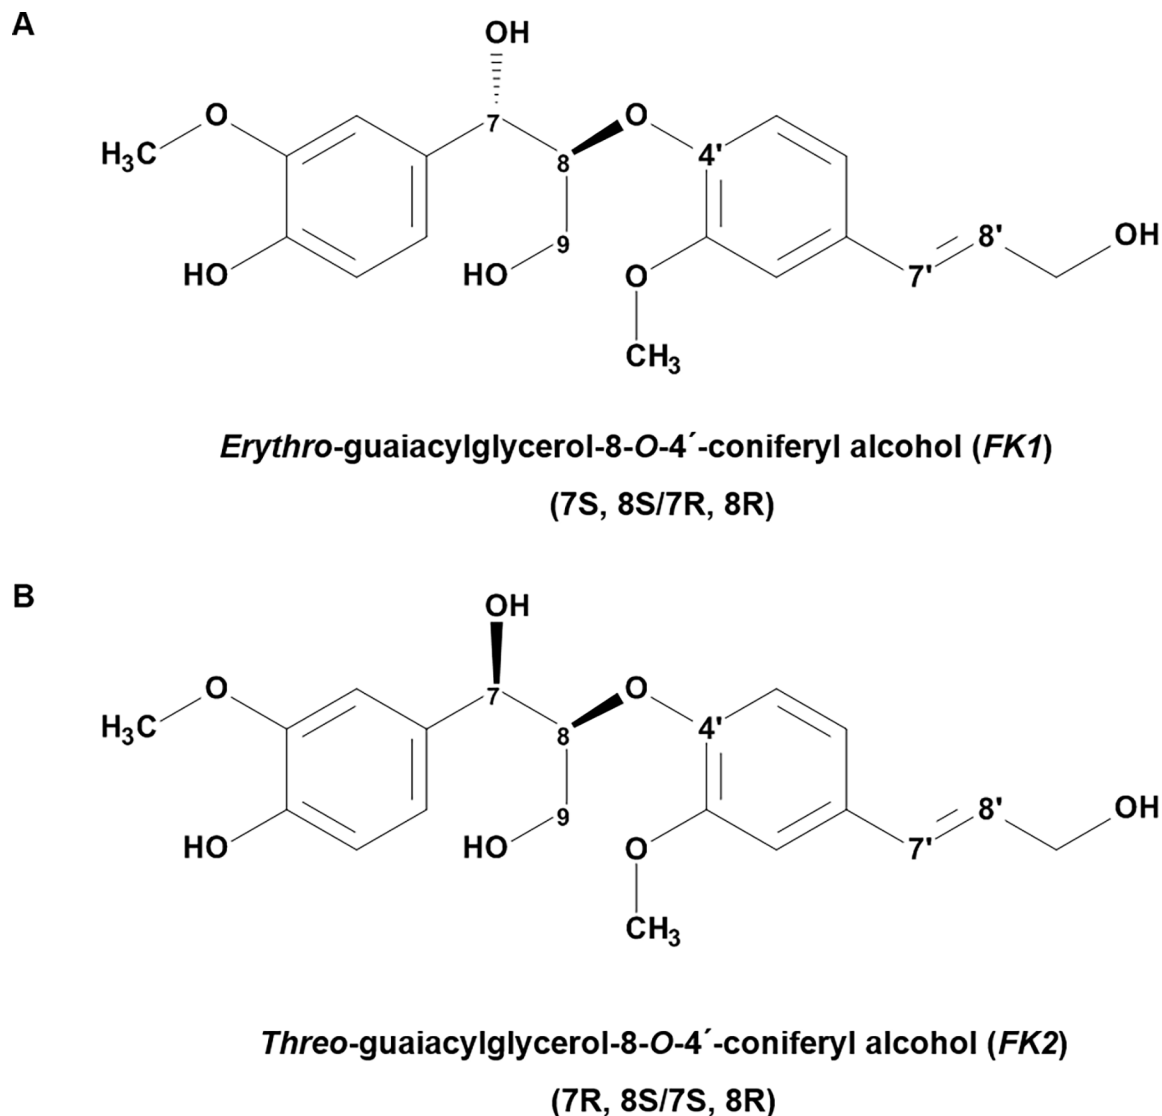

**Fig 2. Chemical structures of purified FK1 and FK2.** Chemical structures of FK1 (*e*GGCE) (A) and FK2 (*t*GGCE) (B), which are coniferyl neolignans, based on the NMR, MS and UV spectroscopic data described in this paper, with *e*GGCE and *t*GGCE containing two chiral carbons (C-7 and C-8). The NMR, MS, UV spectroscopic and pro-angiogenic properties of the isolated FK1 and FK2 were also comparable to commercial *e*GGCE purchased from BOC Sciences, NY, USA, and to naturally-derived *t*GGCE provided by the Second Military Medical University, Shanghai, China.

<https://doi.org/10.1371/journal.pone.0196843.g002>

In the positive mode, the MS spectra was dominated by the sodium adduct ( $m/z$  399 ( $[M+Na]^+$ ) and successive losses of OH ( $m/z$  359,  $[M-OH]^+$ ),  $H_2O$  ( $m/z$  341,  $[M-OH-H_2O]^+$ ) and formaldehyde ( $m/z$  311,  $[M-OH-H_2O-CH_2O]^+$ ) (S3 Fig). A comparison of the observed and calculated masses for these ions showed them to also be in good agreement ( $\Delta$ ppm between -1.32 and 0.58) (S2 Table). It is worth noting the presence of the odd electron ion  $[M]^+$  (S3 Fig). Although it was present in low abundance, this was still sufficient to calculate an elemental formula from the measured accurate mass. Odd electron molecular ions are occasionally observed in ESI MS, particularly when compounds with low redox potential are analysed at low flow rates so that the neutral species is in contact with the capillary/solution interface for a longer time [48].

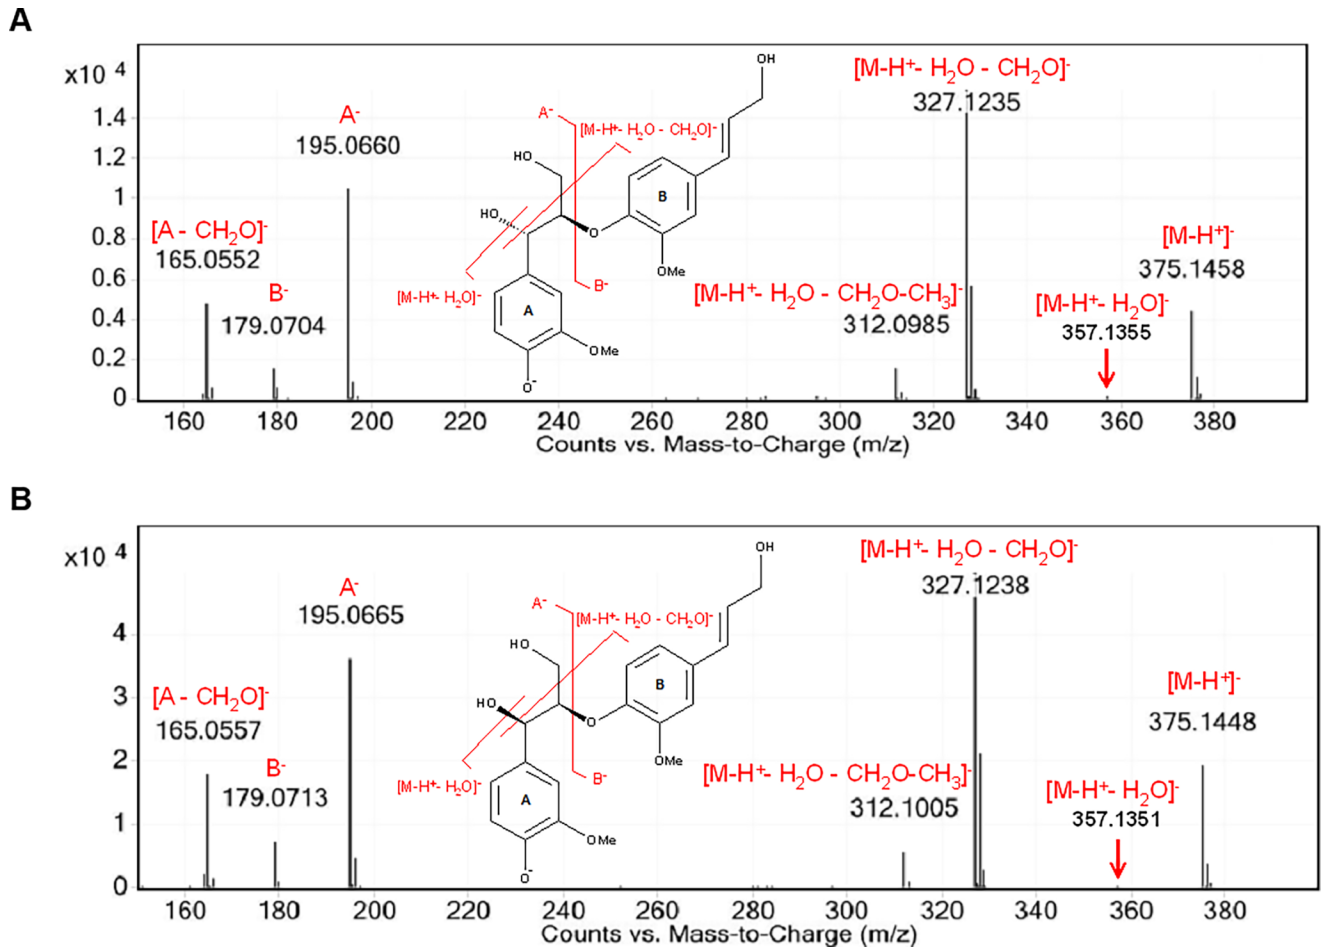

**Fig 3. Negative ion mode ESI-MS/MS spectra analysis of FK1 and FK2.** FK1, *erythro*-guaiacylglycerol-8-*O*-4'-(coniferyl alcohol) ether (*e*GGCE) (A) and FK2, *threo*-guaiacylglycerol-8-*O*-4'-(coniferyl alcohol) ether (*t*GGCE) (B) spectra, selecting *m/z* 375 ([M-H]<sup>-</sup>) for CID at 10 eV.

<https://doi.org/10.1371/journal.pone.0196843.g003>

The NMR and MS data are all consistent with FK1 and FK2 being identified as diastereomers of GGCE, namely *erythro*-guaiacylglycerol-8-*O*-4'-(coniferyl alcohol) ether (*e*GGCE) and *threo*-guaiacylglycerol-8-*O*-4'-(coniferyl alcohol) ether (*t*GGCE) (Fig 2), which are classified as neolignans.

In addition, a commercially purchased sample of *e*GGCE and an independently derived natural product isolate of *t*GGCE (isolated from *Bretschneidera sinensis*) were sourced and found to have near identical spectroscopic and chromatographic properties as the isolated FK1 and FK2, respectively (data not shown).

### ***In vitro* activity of independently sourced *e*GGCE (FK1) and *t*GGCE (FK2) in the rat aorta ring bioassay**

The biological activity of the independently sourced *e*GGCE and *t*GGCE were investigated over a range of concentrations ( $5 \times 10^{-6}$  M to  $5 \times 10^{-9}$  M) to confirm that they had the same activity as those derived from soybean. The results, expressed as percent growth, showed significant enhancement of vessel outgrowth by both *e*GGCE and *t*GGCE compared to the control after 5, 6 and 7 days of culture at the concentrations examined (Fig 4).

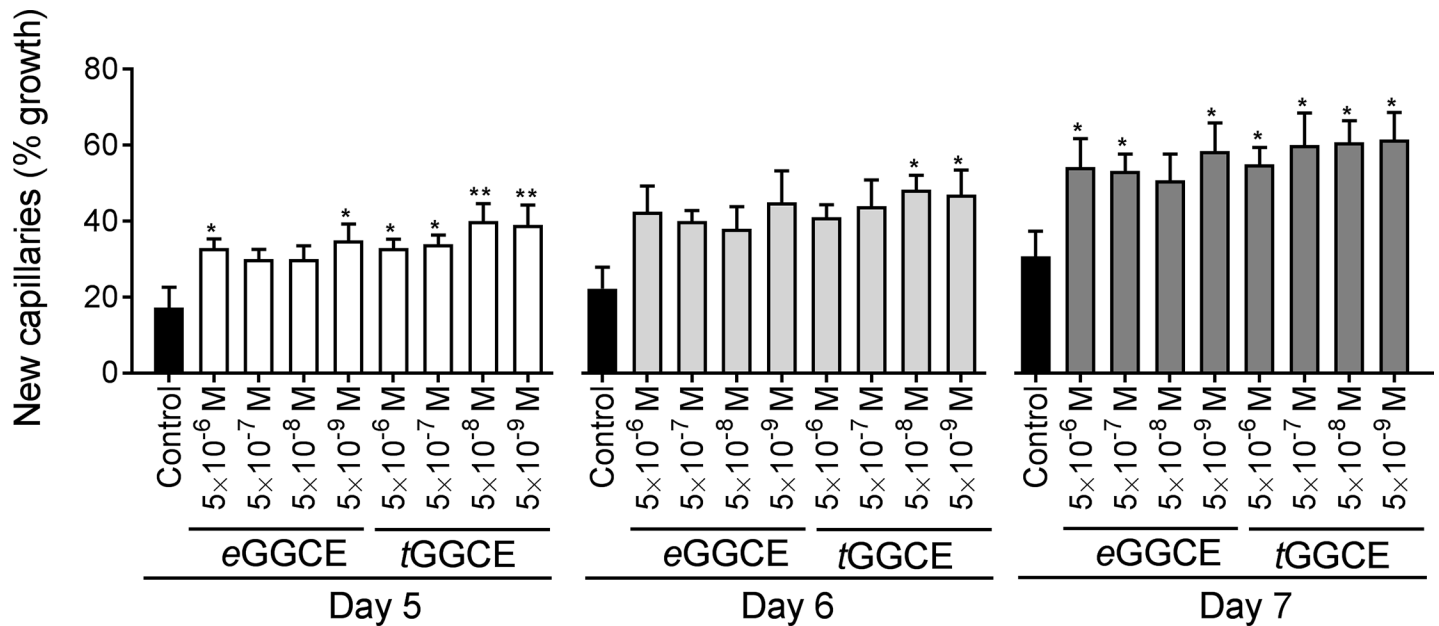

**Fig 4. Pro-angiogenic activity of eGGCE (FK1) and tGGCE (FK2) in the *in vitro* rat aorta assay.** The independently sourced eGGCE and tGGCE preparations were tested at concentrations ranging from  $5 \times 10^{-6}$  M to  $5 \times 10^{-9}$  M. Control cultures contained the same diluent dilution as the test compounds. Data are expressed as a percentage of aorta vessel outgrowths observed on days 5, 6 and 7. Data analysis was performed by Student–Newman–Keuls test after one-way ANOVA comparing each group to control in each treatment. Error bars represent SEM (n = 6). \*,  $P \leq 0.05$ , \*\*,  $\leq 0.01$ .

<https://doi.org/10.1371/journal.pone.0196843.g004>

### Effects of eGGCE (FK1) and tGGCE (FK2) on endothelial cell proliferation

eGGCE and tGGCE were tested at concentrations ranging from  $5 \times 10^{-6}$  M to  $5 \times 10^{-12}$  M for their effect on the proliferation of serum-starved confluent HUVEC with or without the mitogen bFGF (at 12.5 ng/mL). In the presence of bFGF, these molecules significantly induced HUVEC proliferation at  $5 \times 10^{-6}$  M to  $5 \times 10^{-8}$  M and  $5 \times 10^{-6}$  M to  $5 \times 10^{-12}$  M concentrations, respectively (Fig 5). The peak of activity occurred at  $5 \times 10^{-8}$  M in both cases and tapered off at lower and higher concentrations, with tGGCE being more active than eGGCE at the lower concentrations (i.e.,  $5 \times 10^{-9}$  M to  $5 \times 10^{-12}$  M). In addition, the results showed that in the absence of bFGF, tGGCE (but not eGGCE) significantly enhanced HUVEC proliferation between  $5 \times 10^{-8}$  M to  $5 \times 10^{-10}$  M compared to the control. Based on these findings it can be concluded that both neolignans eGGCE and tGGCE can enhance endothelial proliferation, but tGGCE is more effective than eGGCE.

### Effect of eGGCE (FK1) on endothelial cell differentiation (tube formation assay)

HUVEC and HMEC tube formation assays were conducted on Matrigel in the presence and absence of eGGCE and the number of tubes, the number of branch points, the length of tubes, and the percentage of area covered by tubes versus total area were assessed (Aranda and Owen, 2009) using NIH ImageJ [43] and IncuCyte software. Initially, different concentrations of HUVEC ( $1-4 \times 10^4$ /well) were cultured for 6 hr with or without  $5 \times 10^{-6}$  M eGGCE, with enhanced tube formation by HUVECs being observed at all three cell concentrations tested (Fig 6A). Subsequent studies were undertaken at the highest HUVEC concentration ( $4 \times 10^4$ /well) and eGGCE was shown to enhance HUVEC tube formation above control levels with all four measured parameters, with the enhancing activity tapering down with increasing dilution

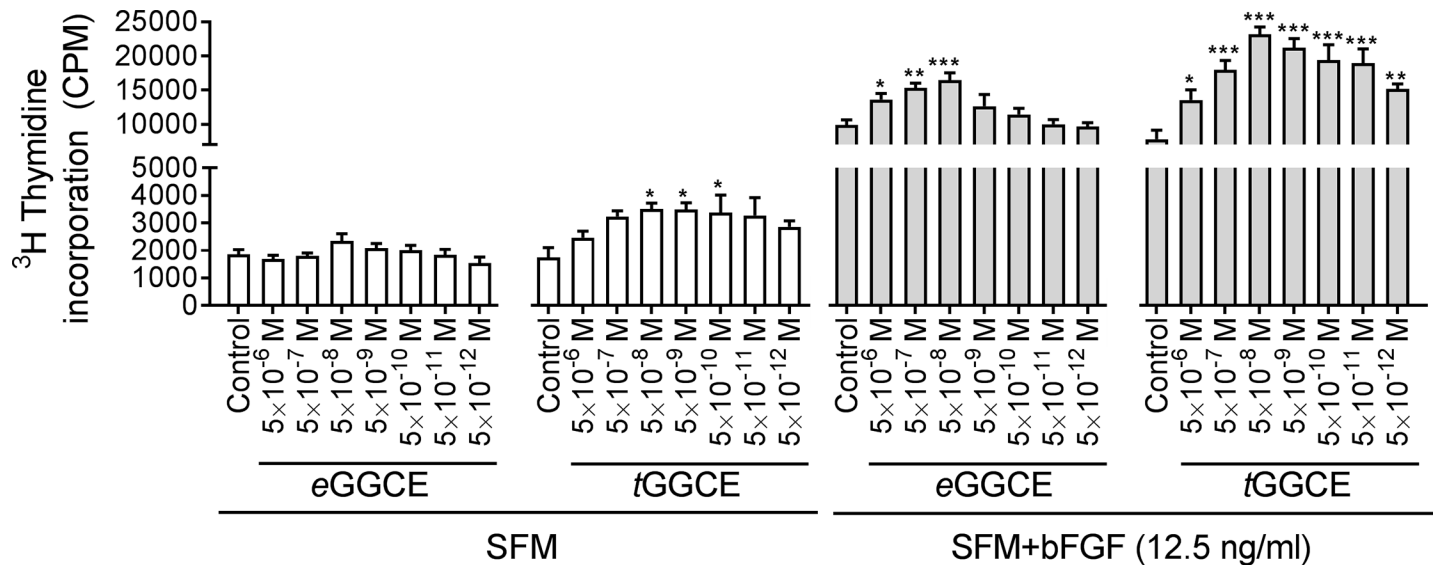

**Fig 5. HUVEC proliferation assay in the presence of eGGCE (FK1) and tGGCE (FK2).** Effect of eGGCE and tGGCE, at concentrations from  $5 \times 10^{-6}$  M to  $5 \times 10^{-12}$  M on confluent serum-starved HUVEC proliferation in serum free media (SFM) with and without the mitogen bFGF (12.5 ng/mL). All the treatments were undertaken in the same experiment and control cultures contained the same diluent dilution as the test compounds. Cell proliferation was measured as  $^3\text{H}$  thymidine incorporation after 24 hr incubation. Data analysis was performed by Student–Newman–Keuls test after one-way ANOVA comparing each group to control in each treatment. Error bars represent SEM (n = 6). \*,  $P \leq 0.05$ , \*\*,  $\leq 0.01$ , \*\*\*,  $\leq 0.001$ . Also, a two-way ANOVA data analysis showed a significant difference for all tested concentrations comparing their effect in SFM to SFM+bFGF (12.5 ng/mL) treatments,  $P \leq 0.0001$ .

<https://doi.org/10.1371/journal.pone.0196843.g005>

(Fig 6B–6E). Denuded areas and total tube length were enhanced only at  $5 \times 10^{-6}$  M, the highest concentration tested, this enhancement being significant for denuded area, whereas the total number of sprouting cells and the number of tubes was significantly higher with eGGCE addition at the three and two highest concentrations tested, respectively ( $5 \times 10^{-6}$  M to  $5 \times 10^{-8}$  M) (Fig 6B–6E). With HMEC ( $4 \times 10^4$  cells/well), tube formation was best measured by circle formation and was evident after 2 hr incubation, with an enhanced response being observed at the two highest eGGCE concentrations tested ( $5 \times 10^{-6}$  M and  $5 \times 10^{-7}$  M) (S4 Fig). Based on these data it can be concluded that the neolignan, eGGCE, can enhance tube formation by human endothelial cells from two different sources, namely the umbilical vein and the microvasculature.

### Effect of eGGCE (FK1) on endothelial cell migration (wound healing assay) and endothelial cell adhesion (Rose Bengal assay)

An endothelial cell migration assay based on cell migration into a denuded area was employed using HMEC to determine the effect of a range of eGGCE concentrations ( $5 \times 10^{-6}$ – $5 \times 10^{-12}$  M) on endothelial cell migration. The extent and speed of wound closure was monitored microscopically every 2 hr over 26 hr (S5 Fig). In six independent experiments (n = 6), eGGCE imparted no measurable effect on the speed and extent of wound closure (S6 Fig).

Since eGGCE was able to significantly enhance HUVEC and HMEC tube formation on the artificial basement membrane, Matrigel, we examined the effect of this compound on cell adhesion to the ECM components, fibronectin and vitronectin, using a Rose Bengal adhesion assay with HMEC. The fibronectin and vitronectin concentrations required for cell adhesion were first optimised by coating the microplate plastic wells with a concentration range of fibronectin and vitronectin (0 to 10  $\mu\text{g}/\text{mL}$ ) to establish the concentration where sub-optimal cell binding was observed. Under these conditions it was reasoned that both enhancement and

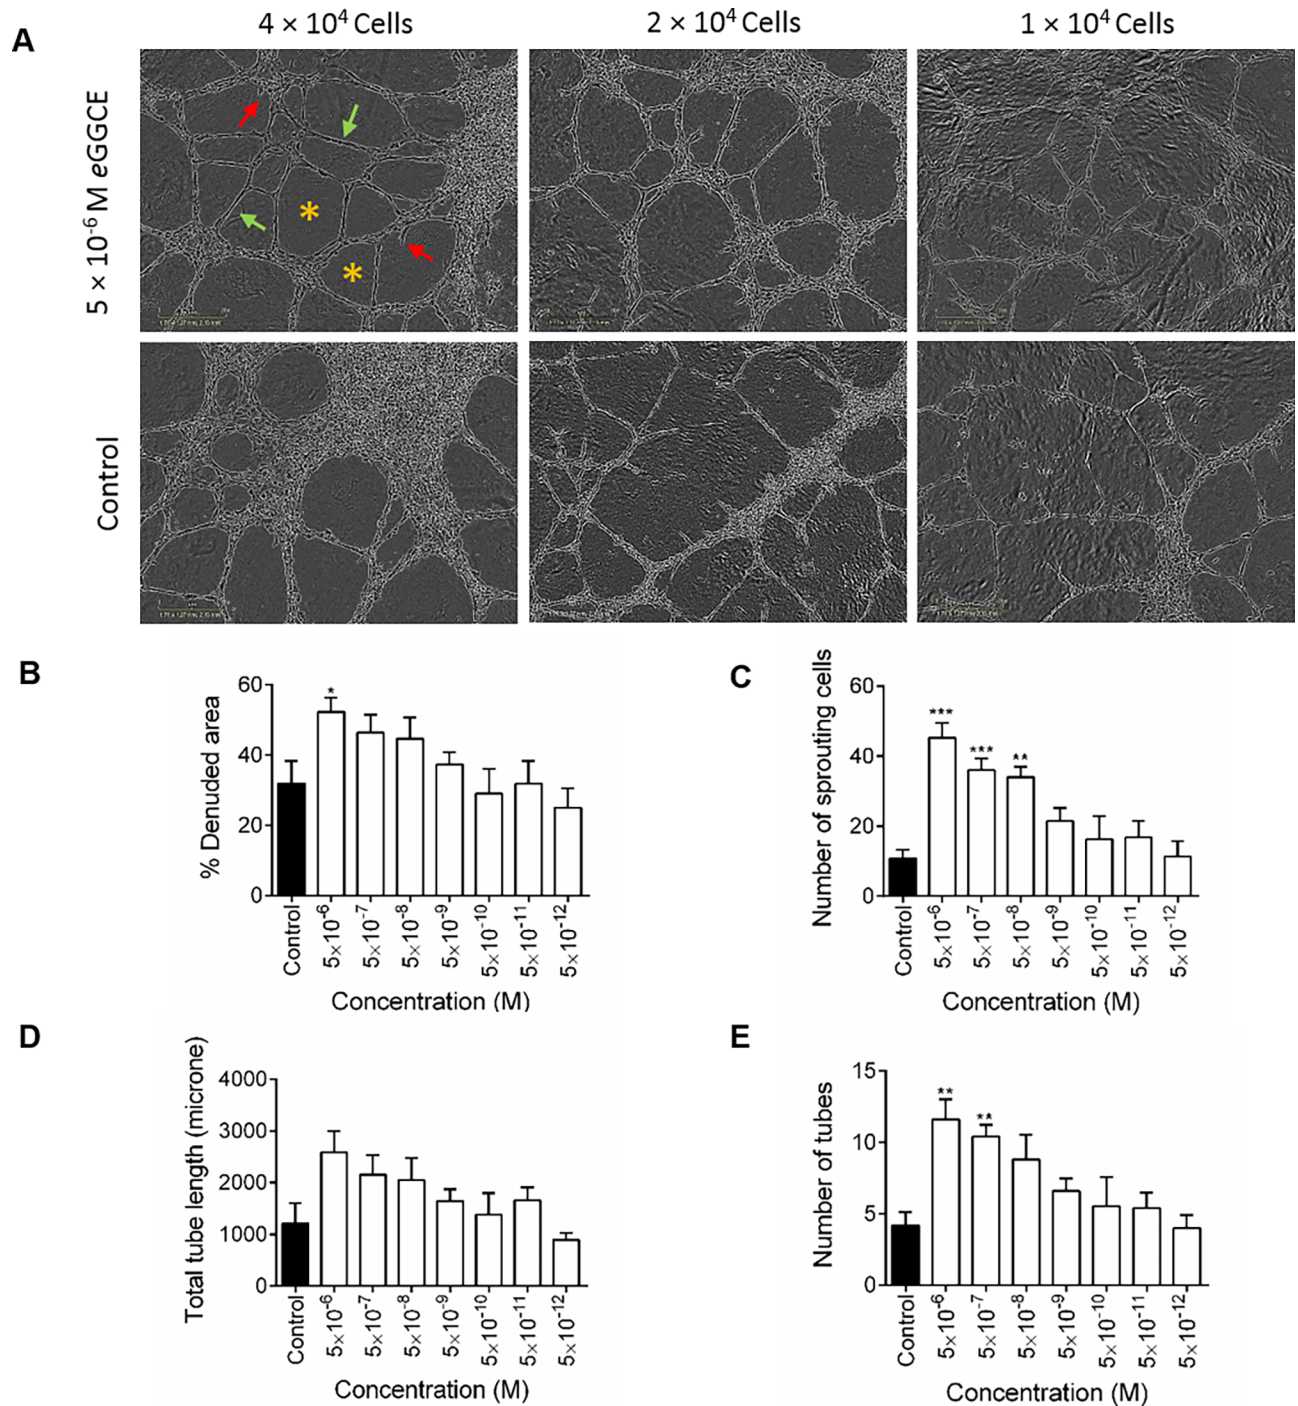

**Fig 6. Effect of eGGCE (FK1) on various parameters of a HUVEC tube formation assay on Matrigel.** (A) Microscopic view of isolated endothelial cells ranging from  $4 \times 10^4$  to  $1 \times 10^4$  cells/well cultured for 6 hr on Matrigel in the absence of compound, or following addition of  $5 \times 10^{-6}$  M eGGCE which enhanced tube formation. (B-E) Effect of eGGCE, at concentrations from  $5 \times 10^{-6}$  M to  $5 \times 10^{-12}$  M, on HUVEC tube formation ( $4 \times 10^4$  cells/well) as measured by (\*, B) percentage denuded area, (→, C) number of sprouting cells, (→, D) total tube length and (E) number of tubes. Parameters shown in (B) and (C) were measured after 4 hr culture and in (D) and (E) after 6 hr culture. Control cultures contained the same diluent dilution as the test compounds. Data analysis was performed by Student–Newman–Keuls test after one-way ANOVA comparing each group to control in each treatment. Error bars represent SEM (n = 6). \*\*,  $\leq 0.01$ , \*\*\*,  $\leq 0.001$ .

<https://doi.org/10.1371/journal.pone.0196843.g006>



inhibition of cell adhesion may be detected in the presence of *e*GGCE at different concentrations. The results showed the optimal concentrations of fibronectin and vitronectin for cell binding were 10  $\mu\text{g}/\text{mL}$  and 5  $\mu\text{g}/\text{mL}$ , respectively, and sub-optimal cell binding occurred at concentrations ranging from 0.313 to 2.5  $\mu\text{g}/\text{mL}$  (S7 Fig). *e*GGCE did not significantly affect HMEC adhesion to fibronectin or vitronectin after 30 or 60 min adhesion nor over a time course from 5–30 min (Fig 7 and S8 Fig). Thus, it was concluded that *e*GGCE had no significant effect on either endothelial cell migration or endothelial cell adhesion to the ECM components fibronectin and vitronectin.

## Discussion

An activity-guided rat aorta ring bioassay with a proven ability to identify anti-angiogenic compounds [33] was modified by reducing the concentration of HIFCS from 20% to 5% [36]. This slowed the rate of tube formation but enabled the screening of pro- and anti-angiogenic activities over three consecutive days. Using this assay in combination with size fractionation and HPLC, soybean xylem sap derived from plants grown under several conditions was repeatedly shown to have three fractions of pro-angiogenic activity. The complexity of the UV spectrum for the earliest eluting material combined with its hydrophilic nature and the instability of *P6*, led us to focus on fractions which contained the UV absorbing peaks *FK1* and *FK2*. Sufficiently pure *FK1* and *FK2* enabled their identification using NMR and high resolution mass spectrometry as the coniferyl lignin precursors, *erythro*-guaiacylglycerol-8-*O*-4'-(coniferyl alcohol) ether (*e*GGCE) and *threo*-guaiacylglycerol-8-*O*-4'-(coniferyl alcohol) ether (*t*GGCE), respectively, and this was verified by comparison with independently sourced samples of each.

In plants, these molecules are termed neolignans, which are derived from the dimerisation of the lignin precursors called monolignols. Lignin is a heterogeneous high molecular weight polymer and a key structural component of secondary plant cell walls [49, 50]. Three monolignols, namely *p*-coumaryl, coniferyl and synapyl alcohols, are synthesised intracellularly and their lignan dimers are secreted extracellularly. This is consistent with the presence of *e*GGCE and *t*GGCE in extracellular xylem sap fluid. Lignans have been found in a range of plants and shown to have a number of medically important biological activities such as anti-tumor [51, 52], anti-oxidant [53] and anti-inflammatory activities [54, 55]. Of particular relevance here is the anti-tumor activity of neolignan metabolites, which has been proposed to be due to the anti-angiogenic activity of these molecules [56]. Collectively, these findings suggest that subtle changes in the structure of neolignans can dramatically change their effects on angiogenesis. In fact, we have previously reported that lipo-chitin oligosaccharides behave in a similar manner, the molecules varying dramatically in their pro- or anti-angiogenic activity depending on their structure [36].

*e*GGCE and *t*GGCE induced tube formation using the rat aorta ring assay at  $\mu\text{M}$  to nM concentrations. Although this bioassay provided initial valuable information about the overall biological activity, other bioassays portraying the major steps in angiogenesis, including endothelial cell proliferation, migration, tube formation and adhesion to extra-cellular matrix components were utilised to understand the cellular mode of action of *e*GGCE and *t*GGCE. A summary of the results obtained is shown in Table 1. A proliferation assay conducted using HUVEC in the presence of a sub-optimal concentration of bFGF (at 12.5 ng/mL) showed that *e*GGCE and *t*GGCE, in particular, were biologically active in enhancing proliferation over a large concentration range peaking at  $5 \times 10^{-8}$  M. In addition, *t*GGCE partially stimulated HUVEC proliferation in the absence of bFGF. This suggests that *t*GGCE may be more active than *e*GGCE. Although *e*GGCE stimulated various aspects of HUVEC and HMEC tube formation in the low  $\mu\text{M}$  range it did not significantly affect endothelial cell migration or the binding

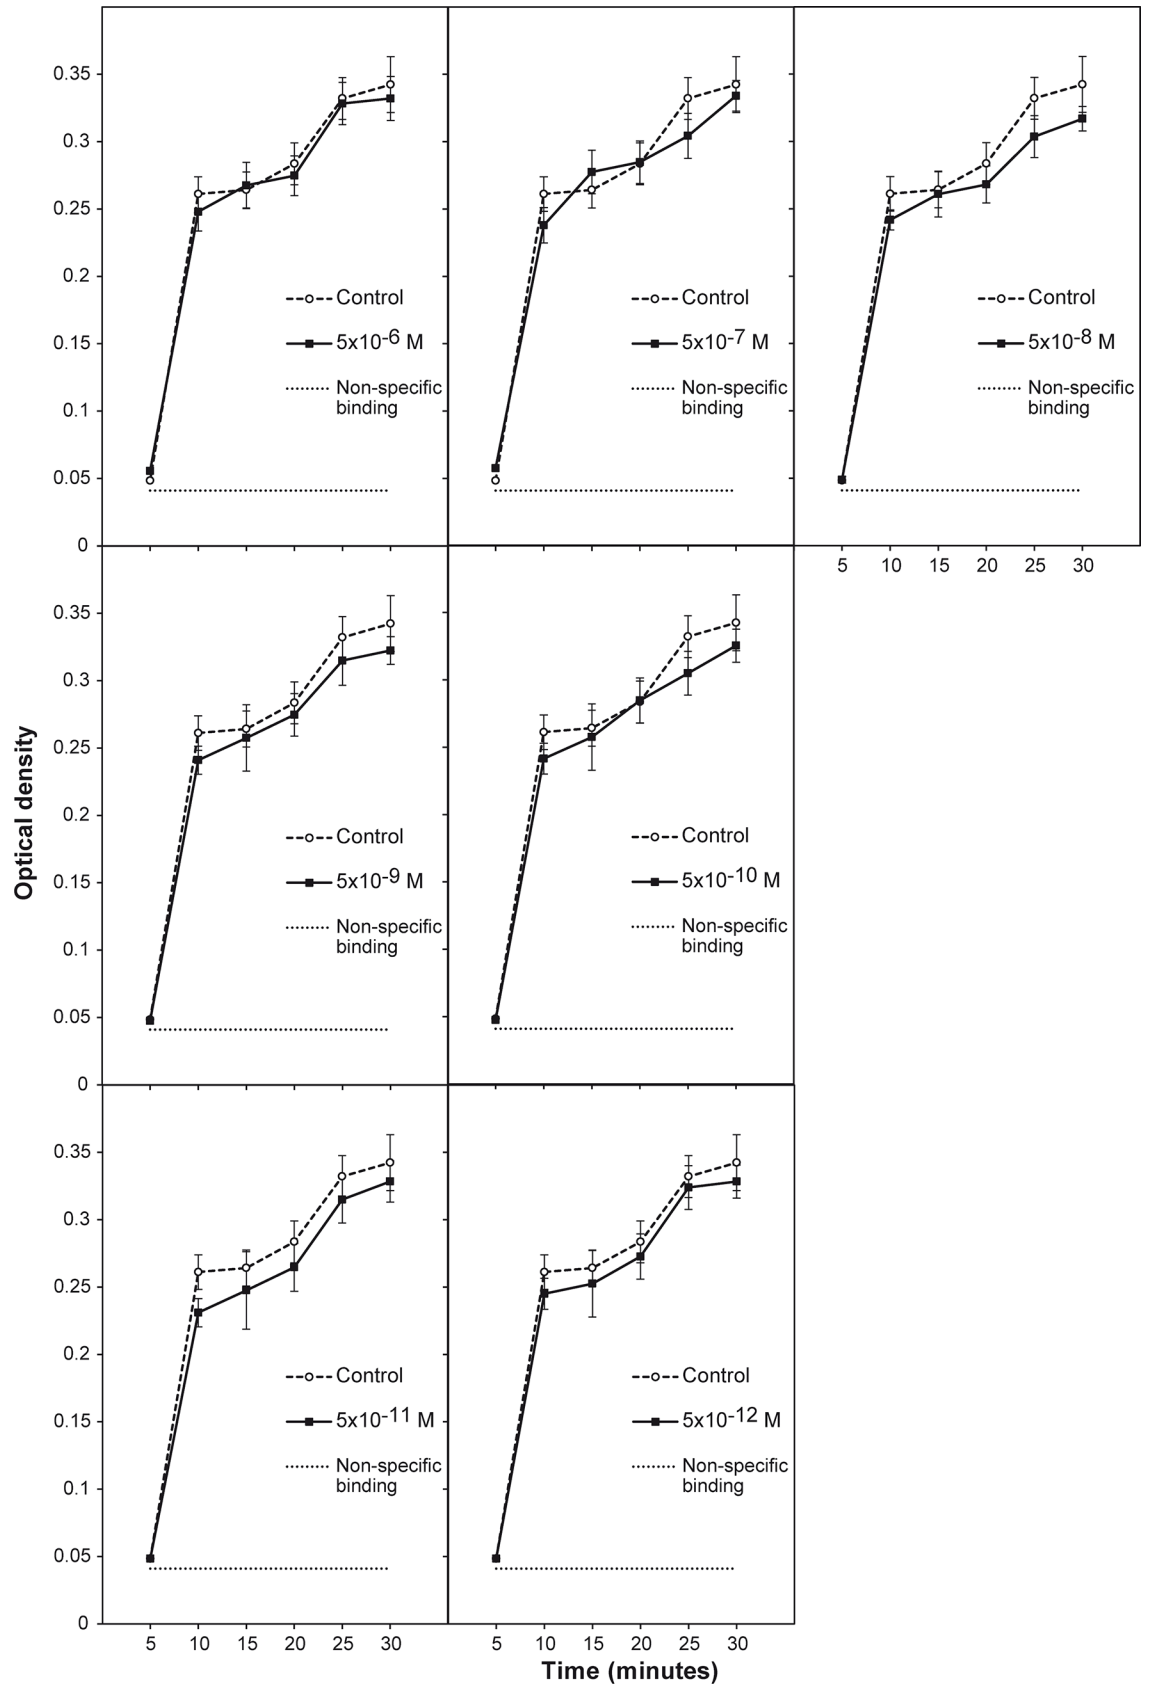

**Fig 7. Time course of the effect of eGGCE (FKI) on fibronectin-mediated HMEC cell adhesion.** Effect of eGGCE on cell adhesion, at concentrations ranging from  $5 \times 10^{-6}$  M to  $5 \times 10^{-12}$  M, was measured using wells coated with  $10 \mu\text{g/mL}$  of fibronectin and after

5–30 min incubation as optical density of Rose Bengal staining adherent cells. Data analysis was performed by one-way and two-way ANOVA, comparing each group to control and other groups. Error bars represent SEM (n = 6). No significant difference in cell adhesion was observed.

<https://doi.org/10.1371/journal.pone.0196843.g007>

**Table 1. Summary of the effects of the soybean-derived neolignans eGGCE and tGGCE on various aspects of angiogenesis.**

| Compound | Angiogenesis | EC Proliferation |       | EC Tube Formation | EC Adhesion |             | EC Migration |
|----------|--------------|------------------|-------|-------------------|-------------|-------------|--------------|
|          |              | -bFGF            | +bFGF |                   | Fibronectin | Vitronectin |              |
| eGGCE    | +            | -                | +     | +                 | -           | -           | -            |
| tGGCE    | ++           | +                | ++    | ++                | NT          | NT          | NT           |

EC, Endothelial Cell; NT, not tested. -, no effect; +, enhancing effect; ++, highly enhancing effect.

<https://doi.org/10.1371/journal.pone.0196843.t001>

of endothelial cells to the extracellular matrix components fibronectin or vitronectin. Therefore, it is most likely that eGGCE and tGGCE work primarily by enhancing vascular tube formation, and may be acting synergistically with bFGF.

In a parallel study the four stereoisomers of GGCE were synthesised and a paper describing the synthesis of these four compounds was recently published [57]. It was found that all four stereoisomers could enhance endothelial cell tube formation, but eGGCE was the least active. Furthermore, the enhanced endothelial cell tube formation induced by the four GGCEs was completely inhibited by PD98059, a flavone that inhibits mitogen-activated protein kinase 1/2 (MEK1/2) and bFGF signalling. These data suggest that the GGCEs enhance angiogenesis via direct activation of the FGFR signalling pathway upstream of MEK1/2.

Thus, this study has successfully identified and characterised two novel pro-angiogenic compounds, *erythro*-guaiacylglycerol-8-*O*-4'-coniferyl alcohol (eGGCE), and *threo*-guaiacylglycerol-8-*O*-4'-coniferyl alcohol (tGGCE) in soybean xylem sap using a rat aorta bioassay guided fractionation approach. Both eGGCE and tGGCE could significantly enhance *in vitro* endothelial cell proliferation and tube formation on an artificial ECM, possibly by potentiating the potent mitogen, bFGF, and its downstream signalling. Thus, the coniferyl neolignans eGGCE and tGGCE represent novel pro-angiogenic molecules with considerable clinical potential.

## Supporting information

**S1 Fig. UV absorbance of HPLC fractions containing FK1, FK2 and P6.** FK1 (A) and FK2 (B). UV absorbance spectra were essentially identical with  $\lambda_{max} = 265$  nm and a shoulder at 298 nm. The UV spectra of P6 (C) was characterised by a  $\lambda_{max}$  at 283 and 343 nm. (TIF)

**S2 Fig. NMR Spectra of FK1 and FK2.** Overlay of <sup>13</sup>C-HSQC spectra for the (A) aliphatic and (B) aromatic region, highlighting the similarity of spectra between FK1 (red/pink) and FK2 (blue/green). Along with coupling constants measured from 1D <sup>1</sup>H NMR spectra, assignments were easily transferred from FK1 to FK2. Negative peaks (green and pink) indicate CH<sub>2</sub> resonances. (TIF)

**S3 Fig. Positive mode ESI-MS of FK1 and FK2.** (A) FK1, *erythro* guaiacylglycerol-8-*O*-4'-(coniferyl alcohol) ether, and (B) FK2, *threo* guaiacylglycerol-8-*O*-4'-(coniferyl alcohol) ether). (TIF)

**S4 Fig. Effect of eGGCE on HMEC tube formation on Matrigel as measured by circle formation.** Microscopic view of isolated endothelial cells cultured for 6 hr on Matrigel (A) in the

absence of compound or (B) following addition of  $5 \times 10^{-6}$  M *e*GGCE which enhanced circle formation, with examples of completed circles indicated (\*). (C) Effect of *e*GGCE, at concentrations from  $5 \times 10^{-6}$  M to  $5 \times 10^{-12}$  M, on HMEC tube formation, measured as number of completed circles. Control cultures contained the same diluent dilution as the test compounds. Data analysis was performed by Student–Newman–Keuls test after one-way ANOVA comparing each group to control in each treatment. Error bars represent SEM (n = 4).

(TIF)

**S5 Fig. Time course of HMEC wound healing assay.** Wounds were made in HMEC monolayer in each well of a 96-well plate using the IncuCyte wound maker. Cell migration towards the denuded area was recorded every 2 hr and wound recovery was complete within 18–20 hr.

(TIF)

**S6 Fig. Effect of synthetic *FK1* (*e*GGCE) on HMEC wound healing assay.** Synthetic *FK1*, at concentrations ranging from  $5 \times 10^{-6}$  M to  $5 \times 10^{-12}$  M, was added to cultures and wound healing was measured as % wound confluence from 0 to 26 hr relative to the initial wound mark. Control cultures contained the same diluent dilution as the test compounds. Data analysis was performed by one-way ANOVA, comparing each group to control. Error bars represent SEM (n = 6). No significant difference in wound healing was observed.

(TIF)

**S7 Fig. Optimisation of fibronectin and vitronectin concentrations used to coat wells for the Rose Bengal adhesion assay using HMEC.** HMEC adhesion to fibronectin (A) and vitronectin (B) was measured as optical density of Rose Bengal staining of adherent cells. Error bars represent SEM (n = 6). The background binding in the absence of fibronectin and vitronectin was < 0.04 optical density unit.

(TIF)

**S8 Fig. Time course of the effect of synthetic *FK1* (*e*GGCE) on vitronectin-mediated HMEC cell adhesion.** Effect of synthetic *FK1* on cell adhesion, at concentrations ranging from  $5 \times 10^{-6}$  M to  $5 \times 10^{-12}$  M, was measured using wells coated with 5  $\mu$ g/mL of vitronectin and after 2.5–25 min incubation as optical density of Rose Bengal staining adherent cells. Data analysis was performed by one-way and two-way ANOVA, comparing each group to control and other groups. Error bars represent SEM (n = 4). No significant difference in cell adhesion was observed.

(TIF)

**S1 Table. Comparison of elemental formulas derived from the observed negative ion mode ESI MS/MS spectra with the calculated elemental formulas for *FK1* and *FK2*.**

(DOCX)

**S2 Table. Comparison of elemental formulas derived from the observed positive ESI MS/MS spectra with the calculated elemental formulas for *FK1* and *FK2*.**

(DOCX)

**S3 Table. Chemical shifts and coupling constants for *FK1* and *FK2*.**

(DOCX)

## Acknowledgments

We thank Prof. Dr. Wei-Dong Zhang and Dr. Shan Lei from the Second Military Medical University, Shanghai, China for the kind gift of *t*GGCE (*FK2*).

## Author Contributions

**Conceptualization:** Farzaneh Kordbacheh.

**Data curation:** Farzaneh Kordbacheh.

**Formal analysis:** Farzaneh Kordbacheh, Charles H. Hocart.

**Funding acquisition:** Christopher R. Parish, Michael A. Djordjevic.

**Investigation:** Farzaneh Kordbacheh, Thomas J. Carruthers, Lauren Du Fall, Charles H. Hocart, Christopher R. Parish, Michael A. Djordjevic.

**Methodology:** Farzaneh Kordbacheh, Thomas J. Carruthers, Anna Bezos, Marie Oakes, Lauren Du Fall, Charles H. Hocart, Christopher R. Parish, Michael A. Djordjevic.

**Project administration:** Farzaneh Kordbacheh.

**Resources:** Christopher R. Parish, Michael A. Djordjevic.

**Supervision:** Charles H. Hocart, Christopher R. Parish, Michael A. Djordjevic.

**Validation:** Farzaneh Kordbacheh.

**Visualization:** Farzaneh Kordbacheh.

**Writing – original draft:** Farzaneh Kordbacheh, Thomas J. Carruthers.

**Writing – review & editing:** Charles H. Hocart, Christopher R. Parish, Michael A. Djordjevic.

## References

1. Carmeliet P. Angiogenesis in health and disease. *Nature Medicine*. 2003; 9(6):653–60. <https://doi.org/10.1038/nm0603-653> PubMed PMID: ISI:000183444100019. PMID: 12778163
2. Folkman J. Opinion—Angiogenesis: an organizing principle for drug discovery? *Nature Reviews Drug Discovery*. 2007; 6(4):273–86. <https://doi.org/10.1038/nrd2115> PubMed PMID: ISI:000245359000012. PMID: 17396134
3. Folkman J. Lessons from antiangiogenic therapy of cancer patients. *Clinical Cancer Research*. 2000; 6:4483s–s. PubMed PMID: ISI:000165409000048.
4. Newman DJ. Natural products as sources of and leads to drugs. *Abstracts of Papers of the American Chemical Society*. 2011; 241. PubMed PMID: ISI:000291982806150.
5. Pezzuto JM. Plant-derived anticancer agents. *Biochemical Pharmacology*. 1997; 53(2):121–33. [https://doi.org/10.1016/S0006-2952\(96\)00654-5](https://doi.org/10.1016/S0006-2952(96)00654-5) PubMed PMID: ISI:A1997VY22700001. PMID: 9037244
6. Welte J, Loges S, Dimmeler S, Carmeliet P. Recent molecular discoveries in angiogenesis and antiangiogenic therapies in cancer. *J Clin Invest*. 2013; 123(8):3190–200. <https://doi.org/10.1172/JCI70212> PubMed PMID: WOS:000322750500003. PMID: 23908119
7. Bao P, Kodra A, Tomic-Canic M, Golinko MS, Ehrlich HP, Brem H. The Role of Vascular Endothelial Growth Factor in Wound Healing. *Journal of Surgical Research*. 2009; 153(2):347–58. <https://doi.org/10.1016/j.jss.2008.04.023> PubMed PMID: ISI:000265585100024. PMID: 19027922
8. Tonnesen MG, Feng XD, Clark RAF. Angiogenesis in wound healing. *Journal of Investigative Dermatology Symposium Proceedings*. 2000; 5(1):40–6. <https://doi.org/10.1046/j.1087-0024.2000.00014.x> PubMed PMID: ISI:000165953800008. PMID: 11147674
9. Pandya NM, Dhalla NS, Santani DD. Angiogenesis—a new target for future therapy. *Vascular Pharmacology*. 2006; 44(5):265–74. <https://doi.org/10.1016/j.vph.2006.01.005> PubMed PMID: ISI:000237719100002. PMID: 16545987
10. Silvestre JS. Pro-angiogenic cell-based therapy for the treatment of ischemic cardiovascular diseases. *Thromb Res*. 2012; 130:S90–S4. <https://doi.org/10.1016/j.thromres.2012.08.287> PubMed PMID: WOS:000310349200029. PMID: 23026676
11. Beck H, Plate KH. Angiogenesis after cerebral ischemia. *Acta Neuropathologica*. 2009; 117(5):481–96. <https://doi.org/10.1007/s00401-009-0483-6> PubMed PMID: ISI:000264853200003. PMID: 19142647



12. Font MA, Arboix A, Krupinski J. Angiogenesis, neurogenesis and neuroplasticity in ischemic stroke. *Curr Cardiol Rev*. 2010; 6(3):238–44. Epub 2011/08/02. <https://doi.org/10.2174/157340310791658802> CCR-6-238 [pii]. PMID: 21804783; PubMed Central PMCID: PMC2994116.
13. Alhusban A, Fouda AY, Pillai B, Ishrat T, Soliman S, Fagan SC. Compound 21 is pro-angiogenic in the brain and results in sustained recovery after ischemic stroke. *J Hypertens*. 2015; 33(1):170–80. <https://doi.org/10.1097/HJH.0000000000000364> PubMed PMID: WOS:000346149700021. PMID: 25304472
14. Ribatti D, Presta M, Vacca A, Ria R, Giuliani R, Dell'Era P, et al. Human erythropoietin induces a pro-angiogenic phenotype in cultured endothelial cells and stimulates neovascularization in vivo. *Blood*. 1999; 93(8):2627–36. PubMed PMID: ISI:000079642400023. PMID: 10194442
15. Dembinska-Kiec A, Polus A, Grzybowska J. The PPAR gamma and beta-carotene activity in the umbilical cord progenitor cell maturation during angiogenesis. *European Heart Journal*. 2004; 25:471–. PubMed PMID: ISI:000224056501882.
16. Costa F, Soares R. Nicotine: A pro-angiogenic factor. *Life Sciences*. 2009; 84(23–24):785–90. <https://doi.org/10.1016/j.lfs.2009.03.002> PubMed PMID: ISI:000266852800001. PMID: 19292988
17. Morimoto N, Takemoto S, Kawazoe T, Suzuki S. Nicotine at a low concentration promotes wound healing. *Journal of Surgical Research*. 2008; 145(2):199–204. <https://doi.org/10.1016/j.jss.2007.05.031> PubMed PMID: ISI:000253999400004. PMID: 17644111
18. Mousa S, Mousa SA. Cellular and molecular mechanisms of nicotine's pro-angiogenesis activity and its potential impact on cancer. *Journal of Cellular Biochemistry*. 2006; 97(6):1370–8. <https://doi.org/10.1002/jcb.20741> PubMed PMID: ISI:000236301500021. PMID: 16365874
19. Lin CM, Chiu JH, Wu IH, Wang BW, Pan CM, Chen YH. Ferulic acid augments angiogenesis via VEGF, PDGF and HIF-1 alpha. *J Nutr Biochem*. 2010; 21(7):627–33. Epub 2009/05/16. <https://doi.org/10.1016/j.jnutbio.2009.04.001> S0955-2863(09)00079-5 [pii]. PMID: 19443196.
20. Dshane J, Chen SF, Caballero S, Grochot-Przeczek A, Was H, Calzi SL, et al. Stromal cell-derived factor 1 promotes angiogenesis via a heme oxygenase 1-dependent mechanism. *Journal of Experimental Medicine*. 2007; 204(3):605–18. <https://doi.org/10.1084/jem.20061609> PubMed PMID: ISI:000245210800021. PMID: 17339405
21. Mac Gabhann F, Qutub AA, Annex BH, Popel AS. Systems biology of pro-angiogenic therapies targeting the VEGF system. *Wiley Interdiscip Rev Syst Biol Med*. 2010; 2(6):694–707. <https://doi.org/10.1002/wsbm.92> PMID: 20890966; PubMed Central PMCID: PMC2990677.
22. Gupta R, Tongers J, Losordo DW. Human studies of angiogenic gene therapy. *Circ Res*. 2009; 105(8):724–36. <https://doi.org/10.1161/CIRCRESAHA.109.200386> PMID: 19815827; PubMed Central PMCID: PMC2770893.
23. Schafer AI. Effects of Nonsteroidal Antiinflammatory Drugs on Platelet-Function and Systemic Hemostasis. *Journal of Clinical Pharmacology*. 1995; 35(3):209–19. PubMed PMID: ISI:A1995QM50500001. PMID: 7608308
24. Wani MC, Taylor HL, Wall ME, Coggon P, Mcphail AT. Plant Antitumor Agents .6. Isolation and Structure of Taxol, a Novel Antileukemic and Antitumor Agent from *Taxus-Brevifolia*. *Journal of the American Chemical Society*. 1971; 93(9):2325–7. <https://doi.org/10.1021/Ja00738a045> PubMed PMID: ISI: A1971J196100044. PMID: 5553076
25. Li QY, Zu YG, Shi RZ, Yao LP. Review Camptothecin: Current Perspectives. *Current Medicinal Chemistry*. 2006; 13(17):2021–39. <https://doi.org/10.2174/092986706777585004> PubMed PMID: ISI:000207523900005. PMID: 16842195
26. Wang ZW, Dabrosin C, Yin X, Fuster MM, Arreola A, Rathmell WK, et al. Broad targeting of angiogenesis for cancer prevention and therapy. *Semin Cancer Biol*. 2015; 35:S224–S43. <https://doi.org/10.1016/j.semcancer.2015.01.001> PubMed PMID: WOS:000366619400011. PMID: 25600295
27. Tu Y, Jeffries C, Ruan H, Nelson C, Smithson D, Shelat AA, et al. Automated High-Throughput System to Fractionate Plant Natural Products for Drug Discovery. *Journal of Natural Products*. 2010; 73(4):751–4. <https://doi.org/10.1021/np9007359> PubMed PMID: ISI:000276950000048. PMID: 20232897
28. Butler MS. The role of natural product chemistry in drug discovery. *Journal of Natural Products*. 2004; 67(12):2141–53. <https://doi.org/10.1021/np040106y> PubMed PMID: ISI:000226070600041. PMID: 15620274
29. Li JWH, Vederas JC. Drug Discovery and Natural Products: End of an Era or an Endless Frontier? *Science*. 2009; 325(5937):161–5. <https://doi.org/10.1126/science.1168243> PubMed PMID: ISI:000267802000035. PMID: 19589993
30. Auerbach R, Lewis R, Shinnars B, Kubai L, Akhtar N. Angiogenesis assays: A critical overview. *Clinical Chemistry*. 2003; 49(1):32–40. <https://doi.org/10.1373/49.1.32> PubMed PMID: ISI:000180195700006. PMID: 12507958

31. Goodwin AM. In vitro assays of angiogenesis for assessment of angiogenic and anti-angiogenic agents. *Microvascular Research*. 2007; 74(2–3):172–83. <https://doi.org/10.1016/j.mvr.2007.05.006> PubMed PMID: ISI:00025143000011. PMID: [17631914](#)
32. Nicosia RF, Ottinetti A. Growth of Microvessels in Serum-Free Matrix Culture of Rat Aorta—a Quantitative Assay of Angiogenesis In vitro. *Laboratory Investigation*. 1990; 63(1):115–22. PubMed PMID: ISI: A1990DQ61900013. PMID: [1695694](#)
33. Parish CR, Freeman C, Brown KJ, Francis DJ, Cowden WB. Identification of sulfated oligosaccharide-based inhibitors of tumor growth and metastasis using novel in vitro assays for angiogenesis and heparanase activity. *Cancer Research*. 1999; 59(14):3433–41. PubMed PMID: ISI:000081539900028. PMID: [10416607](#)
34. Liu CJ, Lee PH, Lin DY, Wu CC, Jeng LB, Lin PW, et al. Heparanase inhibitor PI-88 as adjuvant therapy for hepatocellular carcinoma after curative resection: A randomized phase II trial for safety and optimal dosage. *Journal of Hepatology*. 2009; 50(5):958–68. <https://doi.org/10.1016/j.jhep.2008.12.023> PubMed PMID: ISI:000266384600017. PMID: [19303160](#)
35. Staton CA, Reed MWR, Brown NJ. A critical analysis of current in vitro and in vivo angiogenesis assays. *International Journal of Experimental Pathology*. 2009; 90(3):195–221. <https://doi.org/10.1111/j.1365-2613.2008.00633.x> PubMed PMID: ISI:000265981600001. PMID: [19563606](#)
36. Djordjevic MA, Bezos A, Susanti, Marmuse L, Driguez H, Samain E, et al. Lipo-Chitin Oligosaccharides, Plant Symbiosis Signalling Molecules That Modulate Mammalian Angiogenesis In Vitro. *Plos One*. 2014; 9(12). doi: ARTN e112635 <https://doi.org/10.1371/journal.pone.0112635> PubMed PMID: WOS:000348563300004. PMID: [25536397](#)
37. Herridge DF. Carbon and nitrogen nutrition of two annual legumes: University of Western Australia; 1997.
38. Djordjevic MA, Oakes M, Li DX, Hwang CH, Hocart CH, Gresshoff PM. The Glycine max xylem sap and apoplast proteome. *Journal of Proteome Research*. 2007; 6(9):3771–9. <https://doi.org/10.1021/pr0606833> PubMed PMID: ISI:000249371000041. PMID: [17696379](#)
39. Patel N, Mohd-Radzman NA, Corcilius L, Crossett B, Connolly A, Cordwell SJ, et al. Diverse peptide hormones affecting root growth identified in the Medicago truncatula secreted peptidome. *Mol Cell Proteomics*. 2017. <https://doi.org/10.1074/mcp.RA117.000168> PMID: [29079721](#).
40. Brown KJ, Maynes SF, Bezos A, Maguire DJ, Ford MD, Parish CR. A novel in vitro assay for human angiogenesis. *Lab Invest*. 1996; 75(4):539–55. PMID: [8874385](#).
41. Brown KJ, Hendry IA, Parish CR. Evidence That Carboxyl-Reduced Heparin Fails to Potentiate Acidic Fibroblast Growth-Factor Activity Due to an Inability to Interact with Cell-Surface Heparin Receptors. *Experimental Cell Research*. 1995; 217(1):132–9. <https://doi.org/10.1006/excr.1995.1072> PubMed PMID: ISI:A1995QJ91300017. PMID: [7532589](#)
42. Wang JN, Shi N, Xie WB, Guo X, Chen SY. Response Gene to Complement 32 Promotes Vascular Lesion Formation Through Stimulation of Smooth Muscle Cell Proliferation and Migration. *Arteriosclerosis Thrombosis and Vascular Biology*. 2011; 31(8):E19–E26. <https://doi.org/10.1161/Atvbaha.111.230706> PubMed PMID: ISI:000292918500001. PMID: [21636805](#)
43. Schneider CA, Rasband WS, Eliceiri KW. NIH Image to ImageJ: 25 years of image analysis. *Nat Methods*. 2012; 9(7):671–5. <https://doi.org/10.1038/nmeth.2089> PubMed PMID: WOS:000305942200020. PMID: [22930834](#)
44. O'Neill HC, Parish CR. A Rapid, Automated Colorimetric Assay for Measuring Antibody-Binding to Cell-Surface Antigens. *Journal of Immunological Methods*. 1983; 64(3):257–68. [https://doi.org/10.1016/0022-1759\(83\)90433-7](https://doi.org/10.1016/0022-1759(83)90433-7) PubMed PMID: ISI:A1983RV87900001. PMID: [6366054](#)
45. Lourith N, Katayama T, Suzuki T. Stereochemistry and biosynthesis of 8-O-4' neolignans in *Eucommia ulmoides*: diastereoselective formation of guaiacylglycerol-8-O-4'-(sinapyl alcohol) ether. *Journal of Wood Science*. 2005; 51(4):370–8. <https://doi.org/10.1007/s10086-004-0660-0> PubMed PMID: ISI:000232290400009.
46. Morreel K, Kim H, Lu FC, Dima O, Akiyama T, Vanholme R, et al. Mass Spectrometry-Based Fragmentation as an Identification Tool in Lignomics. *Analytical Chemistry*. 2010; 82(19):8095–105. <https://doi.org/10.1021/ac100968g> PubMed PMID: ISI:000282257400033. PMID: [20795635](#)
47. Morreel K, Dima O, Kim H, Lu FC, Niculaes C, Vanholme R, et al. Mass Spectrometry-Based Sequencing of Lignin Oligomers. *Plant Physiology*. 2010; 153(4):1464–78. <https://doi.org/10.1104/pp.110.156489> PubMed PMID: ISI:000280566000003. PMID: [20554692](#)
48. Vessecchi R, Crotti AEM, Guaratini T, Colepicolo P, Galembek SE, Lopes NP. Radical ion generation processes of organic compounds in electrospray ionization mass spectrometry. *Mini-Rev Org Chem*. 2007; 4(1):75–87. <https://doi.org/10.2174/157019307779815910> PubMed PMID: WOS:000244006400006.
49. Boerjan W, Ralph J, Baucher M. Lignin biosynthesis. *Annual Review of Plant Biology*. 2003; 54:519–46. <https://doi.org/10.1146/annurev.arplant.54.031902.134938> PubMed PMID: ISI:000185094100021. PMID: [14503002](#)

50. Whetten R, Sederoff R. Lignin Biosynthesis. *Plant Cell*. 1995; 7(7):1001–13. <https://doi.org/10.1105/tpc.7.7.1001> PubMed PMID: ISI:A1995RM93700018. PMID: 12242395
51. Qu HY, Madl RL, Takemoto DJ, Baybutt RC, Wang WQ. Lignans are involved in the antitumor activity of wheat bran in colon cancer SW480 cells. *Journal of Nutrition*. 2005; 135(3):598–602. PubMed PMID: ISI:000227509500038. <https://doi.org/10.1093/jn/135.3.598> PMID: 15735100
52. Zhou YJ, Liu YE, Cao JG, Zeng GY, Shen C, Li YL, et al. Vitexins, Nature-Derived Lignan Compounds, Induce Apoptosis and Suppress Tumor Growth. *Clinical Cancer Research*. 2009; 15(16):5161–9. <https://doi.org/10.1158/1078-0432.CCR-09-0661> PubMed PMID: ISI:000269024900018. PMID: 19671865
53. Kancheva VD, Saso L, Angelova SE, Foti MC, Slavova-Kasakova A, Daquino C, et al. Antiradical and antioxidant activities of new bio-antioxidants. *Biochimie*. 2012; 94(2):403–15. <https://doi.org/10.1016/j.biochi.2011.08.008> PubMed PMID: ISI:000300270900015. PMID: 21884748
54. Baumgartner L, Sosa S, Atanasov AG, Bodensieck A, Fakhrudin N, Bauer J, et al. Lignan Derivatives from *Krameria lappacea* Roots Inhibit Acute Inflammation in Vivo and Pro-inflammatory Mediators in Vitro. *Journal of Natural Products*. 2011; 74(8):1779–86. <https://doi.org/10.1021/np200343t> PubMed PMID: ISI:000294242800015. PMID: 21800856
55. Hallund J, Tetens I, Bugel S, Tholstrup T, Bruun JM. The effect of a lignan complex isolated from flaxseed on inflammation markers in healthy postmenopausal women. *Nutrition Metabolism and Cardiovascular Diseases*. 2008; 18(7):497–502. <https://doi.org/10.1016/j.numecd.2007.05.007> PubMed PMID: ISI:000259537600007. PMID: 18502107
56. Hodges TW, Hossain CF, Kim YP, Zhou YD, Nagle DG. Molecular-targeted antitumor agents: The *Saururus cernuus* dineolignans manassantin B and 4-O-demethylmanassantin B are potent inhibitors of hypoxia-activated HIF-1. *J Nat Prod*. 2004; 67(5):767–71. <https://doi.org/10.1021/np030514m> PubMed PMID: WOS:000221804700005. PMID: 15165135
57. Buckler JN, Banwell MG, Kordbacheh F, Parish CR, Santiago FS, Khachigian LM. Developing Neolignans as Proangiogenic Agents: Stereoselective Total Syntheses and Preliminary Biological Evaluations of the Four Guaiacylglycerol 8-O-4'-Coniferyl Ethers. *ACS Omega*. 2017; 2(10):7375–88. <https://doi.org/10.1021/acsomega.7b01459> PMID: 29242850
